# Supplementary material
Source: PubMed Central journal article supplement (PMC9438931)
Supplement: NIHMS1602242-supplement-Color_Figure_Form.pdf [file NIHMS1602242-supplement-Color_Figure_Form.pdf]

Dear Author,

Please review the fees to produce your figures in color in *Health Physics*. The price for the first color figure is \$500. The charge for each additional color figure is \$150.

If this charge meets with your approval, please identify which figures/pieces should be printed in color, sign below, and upload this file with your revised manuscript. If your institution or affiliation will cover the cost, please have your purchasing agent sign below. I will hold the color illustration(s) at my desk until I hear from you. You will be invoiced for all article charges (color separations, reprints, etc.) after publication.

If you do not wish your figures to run in color, please indicate, "Decline color" below. The figures will then run in black and white.

Thank you

Figures to appear in color: 7 total figures; fig, 4, 5, 6, 7, 8, 9, 10

Total cost for color figures: \$1,400

Article Number: \_\_\_\_\_

Thomas J. MacVittie

\_\_\_\_\_  
Printed Name

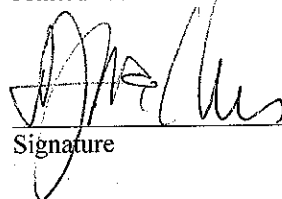 4/21/20  
\_\_\_\_\_  
Signature Date

Decline Color
