# Supplementary material
Source: PubMed Central journal article supplement (PMC9438931)
Supplement: NIHMS1602242-supplement-letter_to_the_Editor.pdf [file NIHMS1602242-supplement-letter_to_the_Editor.pdf]

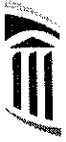

UNIVERSITY of MARYLAND

Thomas J. MacVittie, MS, PhD

Departments of Radiation Oncology and Pathology  
10 South Pine Street, MSTF 5-02  
Baltimore, MD 21201  
410 706.5255

[tmacvittie@som.umaryland.edu](mailto:tmacvittie@som.umaryland.edu)

May 25, 2020

Brant A. Ulsh, Ph.D., CHP  
Editor, Health Physics Journal  
Editorial Office  
897 Baccarat Drive, Cincinnati, OH 45245;  
1-513-805-3445 (phone)

Dear Dr. Ulsh:

Please accept our revised manuscript, RE: HPJ-D-20-00049, entitled, **“A systematic review of the hematopoietic acute radiation syndrome (H ARS) in canines and nonhuman primates: Acute mixed neutron/gamma versus reference quality radiations.”** by Thomas J. MacVittie, Ann M. Farese and William Jackson III.

Please find attached the response to reviewers and the revised manuscript. We have responded to all the reviewer's queries and found the review extremely helpful in preparing a "better" manuscript for the community. It was an excellent review. We extend our compliments to the reviewers for their time and expertise.

We appreciate your time and effort on our behalf and that of the readership of the Journal, Health Physics.

Sincerely,

Thomas J. MacVittie, M.S., Ph.D.  
Professor Emeritus  
Department of Radiation Oncology, University of Maryland, School of Medicine

10 South Pine Street  
MSTF 5-02  
Baltimore, MD 21201

Phone 410-706-5255  
[tmacvittie@som.umaryland.edu](mailto:tmacvittie@som.umaryland.edu)
